# Supplementary material
Source: Springer Nature journal article supplement (https://www.springermedizin.de/resource/supplementary/12957_2012_1281_MOESM4_ESM.pdf/9562910)

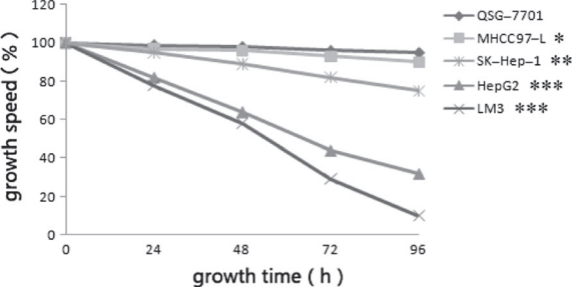

\*  $P > 0.05$ , \*\*  $P < 0.05$ , \*\*\*  $P < 0.01$

Supplement: MOESM4 [file 9562910]
